# Supplementary material for: TNF-α-Induced YAP/TAZ Activity Mediates Leukocyte-Endothelial Adhesion by Regulating VCAM1 Expression in Endothelial Cells
Source: PubMed Central journal article supplement (PMC6274800; doi:10.3390/ijms19113428), 2018-11-01
Supplement: ijms-19-03428-s001.pdf [file ijms-19-03428-s001.pdf]

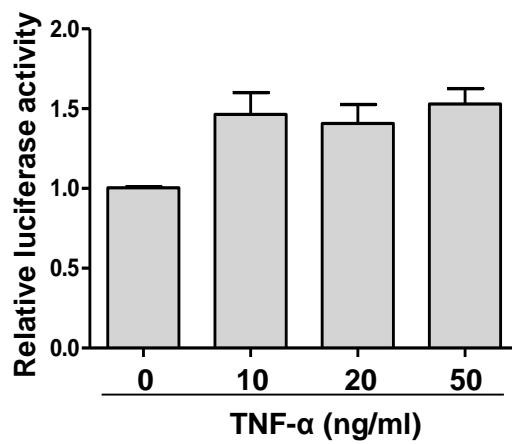

Figure S1. HUVECs were transfected with pGL3-basic- or p8XGTIIC-Luciferase reporter along with pRL-Tk internal control vector. Cells were stimulated with TNF- $\alpha$  for 6 h. Luciferase activity was measured and normalized to Renilla activity.

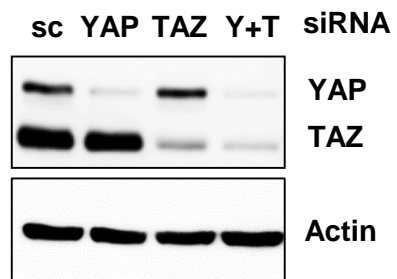

Figure S2. HUVECs were transfected with 25 nM siRNA specific to YAP/TAZ. The reduction of YAP and TAZ expression was determined by immunoblotting at 48 h after transfection.

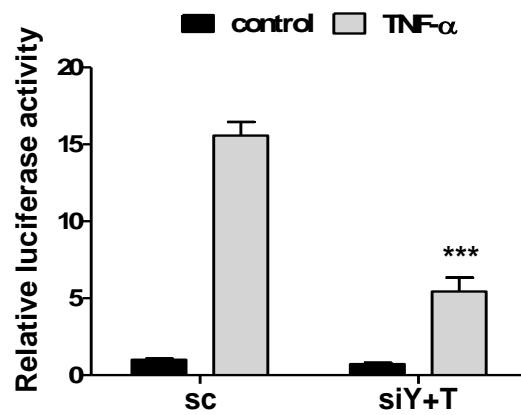

Figure S3. HUVECs were transfected with the VCAM1 promoter-Luciferase reporter plasmid and the pRL-Tk internal control vector at 24 h after siRNA transfection. The cells were stimulated with TNF- $\alpha$  for 6 h, and luciferase activity was measured. \*\*\*  $P < 0.001$  vs TNF- $\alpha$ -treated scrambled siRNA-transfected cells.

**Table S1.** Primer sequences used in qRT-PCR

| Genes | Primers              |
|-------|----------------------|
| ANKRD | gcccgagataagttgctcag |
|       | atcatgcaacggggatctc  |
| Cyr61 | ggtcaaagttaccgggcagt |
|       | ggaggcatcgaatcccag   |
| VCAM1 | aaaagcggagacaggagaca |
|       | gcacgagaagctcaggagaa |
| ICAM1 | ctgaccgtgaatgtgctctc |
|       | ttggcctgtttagtctgt   |
| GAPDH | accagaagactgtggatgg  |
|       | tctagacggcaggtcaggtc |
